# Supplementary material for: Risk of newly developing visual field defect and neurodegeneration after pars plana vitrectomy for idiopathic epiretinal membrane
Source: PubMed Central journal article supplement — Br J Ophthalmol. 2020 Oct 5;105(12):1683–7. doi: 10.1136/bjophthalmol-2020-317478 (PMC8639907; doi:10.1136/bjophthalmol-2020-317478), 2020-10-05
Supplement: bjophthalmol-2020-317478supp001.pdf [file bjophthalmol-2020-317478supp001.pdf]

**Supplementary Table 1. Baseline characteristics**

|                                      |                              |
|--------------------------------------|------------------------------|
| Eyes                                 | 30                           |
| Age (y/o, mean, (range))             | 66.1 ± 1.9 (43–84)           |
| Sex (male; eyes (%))                 | 15 (50.0)                    |
| BCVA (LogMAR, mean, (range))         | 0.202 ± 0.034 (-0.079–0.523) |
| CRT (µm, mean, (range))              | 376 ± 25 (72–630)            |
| CCT (µm, mean, (range))              | 180 ± 9 (110–294)            |
| Surgery                              |                              |
| Combined cataract surgery (eyes (%)) | 19 (63.3)                    |
| ILM peeling (eyes (%))               | 20 (66.7)                    |
| 25 G PPV system (eyes (%))           | 9 (30.0)                     |
| 27 G PPV system (eyes (%))           | 21 (70.0)                    |
| Brilliant Blue G-staining            | 28 (93.3)                    |

Data are expressed as mean ± SE. BCVA, best-corrected visual acuity; CRT, central retinal thickness; CCT, central choroidal thickness; ILM, internal limiting membrane; PPV, pars plana vitrectomy.

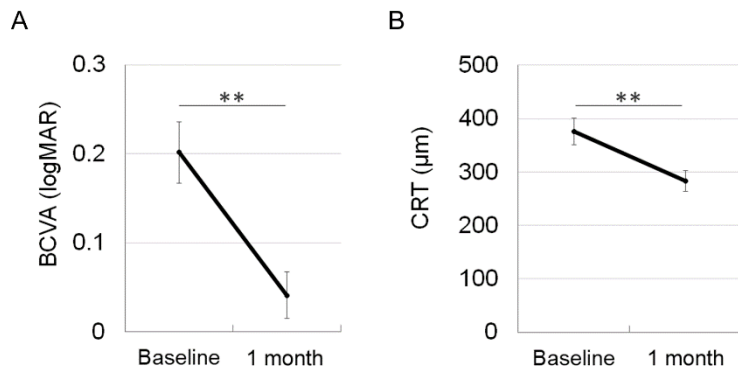

**Supplementary Figure 1.** Mean best-corrected visual acuity (BCVA) and central retinal thickness (CRT) at baseline and at 1 month postoperatively. Both mean BCVA (A) and CRT (B) improved 1 month after pars plana vitrectomy. Data are expressed as mean  $\pm$  SE. Paired t-test. \*P<0.05.

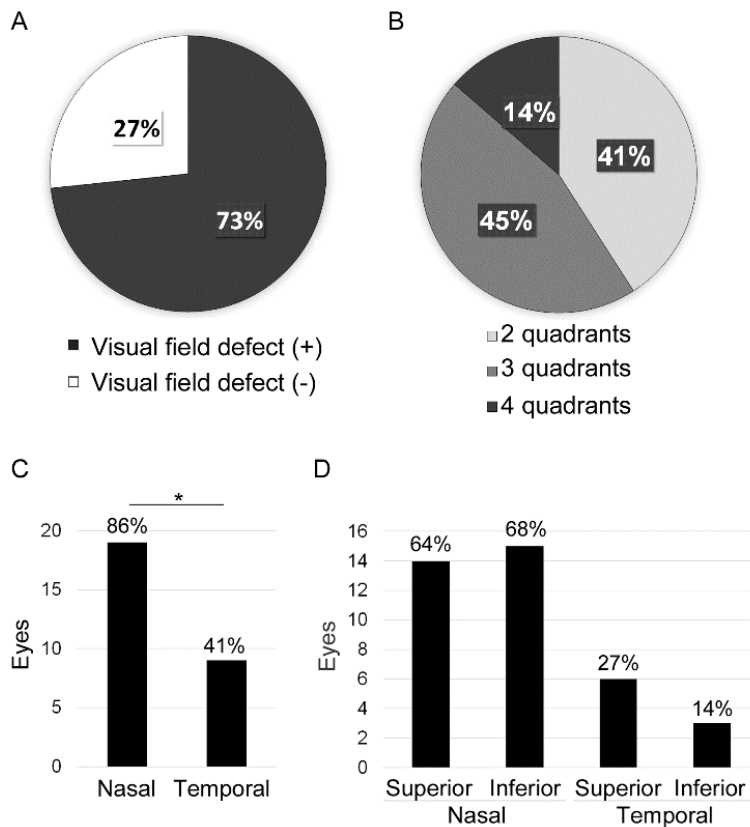

**Supplementary Figure 2.** Newly appeared visual field defect (VFD) by 1 month after pars plana vitrectomy for idiopathic epiretinal membrane. (A–D) Ratios of the eyes are shown. (A) VFD appeared in 73% of all eyes. (B) All VFDs spanned two to four quadrants. (C) Chi-square test. Involvement of the nasal area was significantly greater than that of the temporal area. Both the nasal and temporal areas were involved in 27% of the eyes. \*P<0.05. (D) Involvement of each quadrant is shown.
